# Supplementary material for: Cationic Axial Ligand Effects on Sulfur-Substituted Subphthalocyanines
Source: MDPI journal article supplement (doi:10.3390/molecules27092766), 2022-04-26
Supplement: s1 [file s1]

# Cationic Axial Ligand Effects on Sulfur-Substituted Subphthalocyanines

Yusaku Ogura <sup>1</sup>, Masahiro Nakano <sup>1</sup>, Hajime Maeda <sup>1</sup>, Masahito Segi <sup>1</sup> and Taniyuki Furuyama <sup>1,2,\*</sup>

<sup>1</sup> Graduate School of Natural Science and Technology, Kanazawa University, Kakuma-machi, Kanazawa 920-1192, Japan; rkddm\_5658@stu.kanazawa-u.ac.jp (Y.O.); masahiro-nakano@se.kanazawa-u.ac.jp (M.N.); maeda-h@se.kanazawa-u.ac.jp (H.M.); segi@staff.kanazawa-u.ac.jp (M.S.)

<sup>2</sup> Japan Science and Technology Agency (JST)-PRESTO, 4-1-8 Honcho, Kawaguchi, Saitama 332-0012, Japan

\* Correspondence: tfuruyama@se.kanazawa-u.ac.jp

## Supplementary Materials

### Table of Contents

|                                                |     |
|------------------------------------------------|-----|
| General Comments                               | S–1 |
| Copies of the NMR Spectra of Studied Compounds | S–2 |
| Full Computational Details                     | S–6 |

## General Comments

### Instrumentation

NMR spectra were obtained using JEOL ECA-500 or Bruker AVANCE 400 spectrometer. Chemical shifts are expressed in  $\delta$  (ppm) values, and coupling constants are expressed in hertz (Hz).  $^1\text{H}$  NMR spectra were referenced to the tetramethylsilane (TMS) as an internal standard. The following abbreviations are used: s = singlet, d = doublet, m = multiplet, and brs = broad singlet. High-resolution mass spectra (HRMS) were recorded using a Bruker Daltonics solariX spectrometer (MALDI). Electronic absorption spectra were recorded on a JASCO V-770 spectrophotometer. Fluorescence spectra were obtained using a HITACHI F-4500 spectrofluorometer. Absolute fluorescence quantum yields ( $\Phi_{\text{PL}}$ ) were measured using a calibrated integrating sphere system (Quantaaurus-QY Plus C13534-22, Hamamatsu photonics). Time-resolved photoluminescence lifetime ( $\tau$ ) measurements were carried out using a time-correlated single photon counting lifetime spectroscopy system (Quantaaurus-Tau C11367-22, Hamamatsu photonics). The decay constants and fitting parameters for the transient decays were determined using the software embedded in the Quantaaurus-Tau system. Cyclic voltammetry (CV) measurements were recorded using a Hokuto Denko HZ7000 potentiostat under a nitrogen atmosphere with 0.1 M of tetrabutylammonium perchlorate (TBAP) as the supporting electrolyte. Measurements were made using a glassy carbon electrode (area = 0.07 cm<sup>2</sup>), an Ag/AgCl reference electrode, and a Pt wire counter electrode. The concentration of the solution was fixed at 0.5 mM, and the sweep rate was set to 100 mV/s. The ferrocenium/ferrocene ( $\text{Fc}^+/\text{Fc}$ ) couple was used as an internal standard. Ionization potentials were determined from the onset of the photoelectron spectroscopy in air (AC-2, Riken Keiki).

## Copies of the NMR Spectra of Studied Compounds

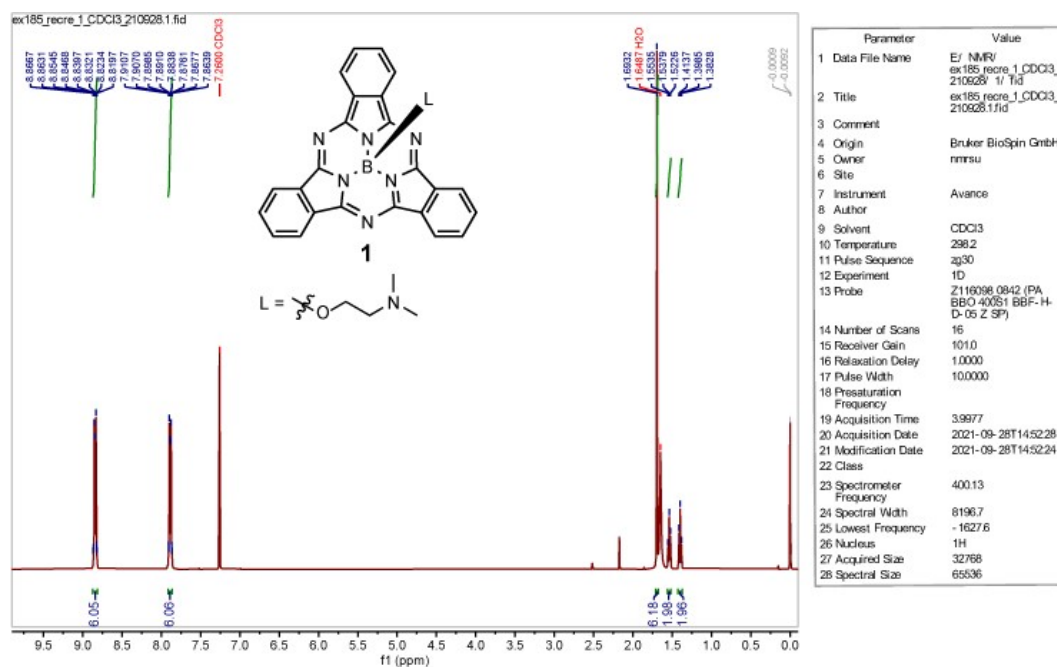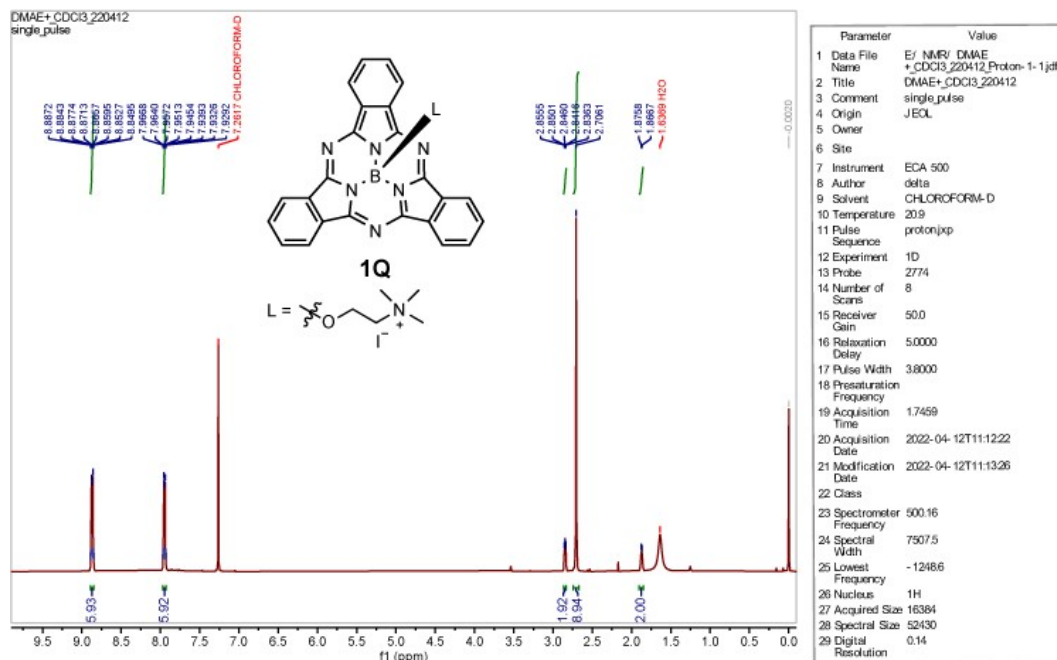

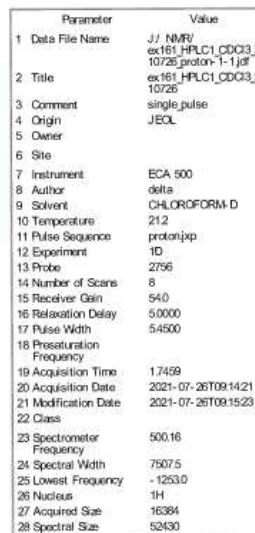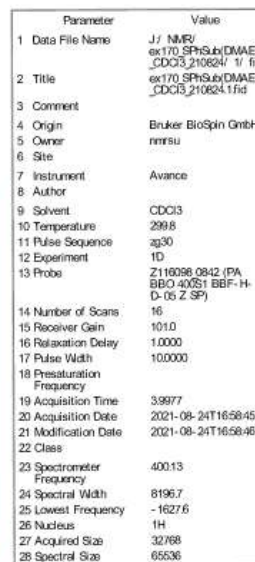



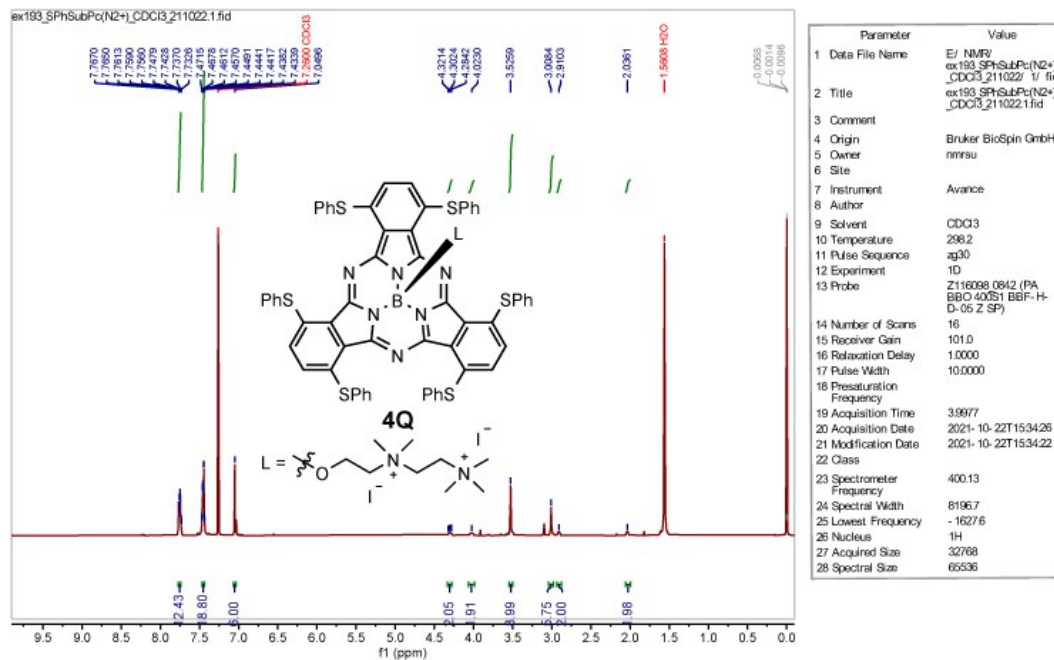

## Full Computational Details

### Computational Details

Geometry optimization for all molecules was performed at the DFT level, by means of the hybrid Becke3LYP [36–39] (B3LYP) functional as implemented in Gaussian 16 [40]. The 6-31G(d) basis set was used for the all atoms. After the geometry optimization, the time-dependent (TD) DFT calculations [41,42] were performed to evaluate the stick absorption spectrum employing the same level or  $\omega$ B97XD [43] and basis set. All calculations used a relatively simple self-consistent reaction field (SCRF) method based on the polarizable continuum model (PCM) [44] that mimicked the solvation effect of dichloromethane ( $\epsilon = 8.93$ ). All stationary points were optimized without any symmetry assumptions, and characterized by normal coordinate analysis at the same level of theory (the number of imaginary frequencies, NIMAG was 0).

**Table S1.** Calculated excited wavelengths ( $\lambda$ ) and oscillator strengths ( $f$ ) for components of selected transition energies. Calculations were performed at the  $\omega$ B97XD/6-31G\*//B3LYP/6-31G\* level of theory using a polarizable continuum model (PCM), which mimicked the solvation effect of dichloromethane.

|            | $\lambda$ / nm | $f$  | Composition                                                         |
|------------|----------------|------|---------------------------------------------------------------------|
| <b>1</b>   | 504            | 0.46 | HOMO-4 $\rightarrow$ LUMO+1 (2.5%), HOMO $\rightarrow$ LUMO (94.9%) |
|            | 503            | 0.46 | HOMO-4 $\rightarrow$ LUMO (2.4%), HOMO $\rightarrow$ LUMO+1 (94.8%) |
| <b>1Q</b>  | 507            | 0.45 | HOMO $\rightarrow$ LUMO (95.2%)                                     |
|            | 504            | 0.45 | HOMO $\rightarrow$ LUMO+1 (95.1%)                                   |
| <b>3'</b>  | 553            | 0.57 | HOMO $\rightarrow$ LUMO (93.1%)                                     |
|            | 552            | 0.57 | HOMO $\rightarrow$ LUMO+1 (93.0%)                                   |
| <b>3Q'</b> | 561            | 0.57 | HOMO $\rightarrow$ LUMO (93.3%)                                     |
|            | 558            | 0.57 | HOMO $\rightarrow$ LUMO+1 (93.3%)                                   |

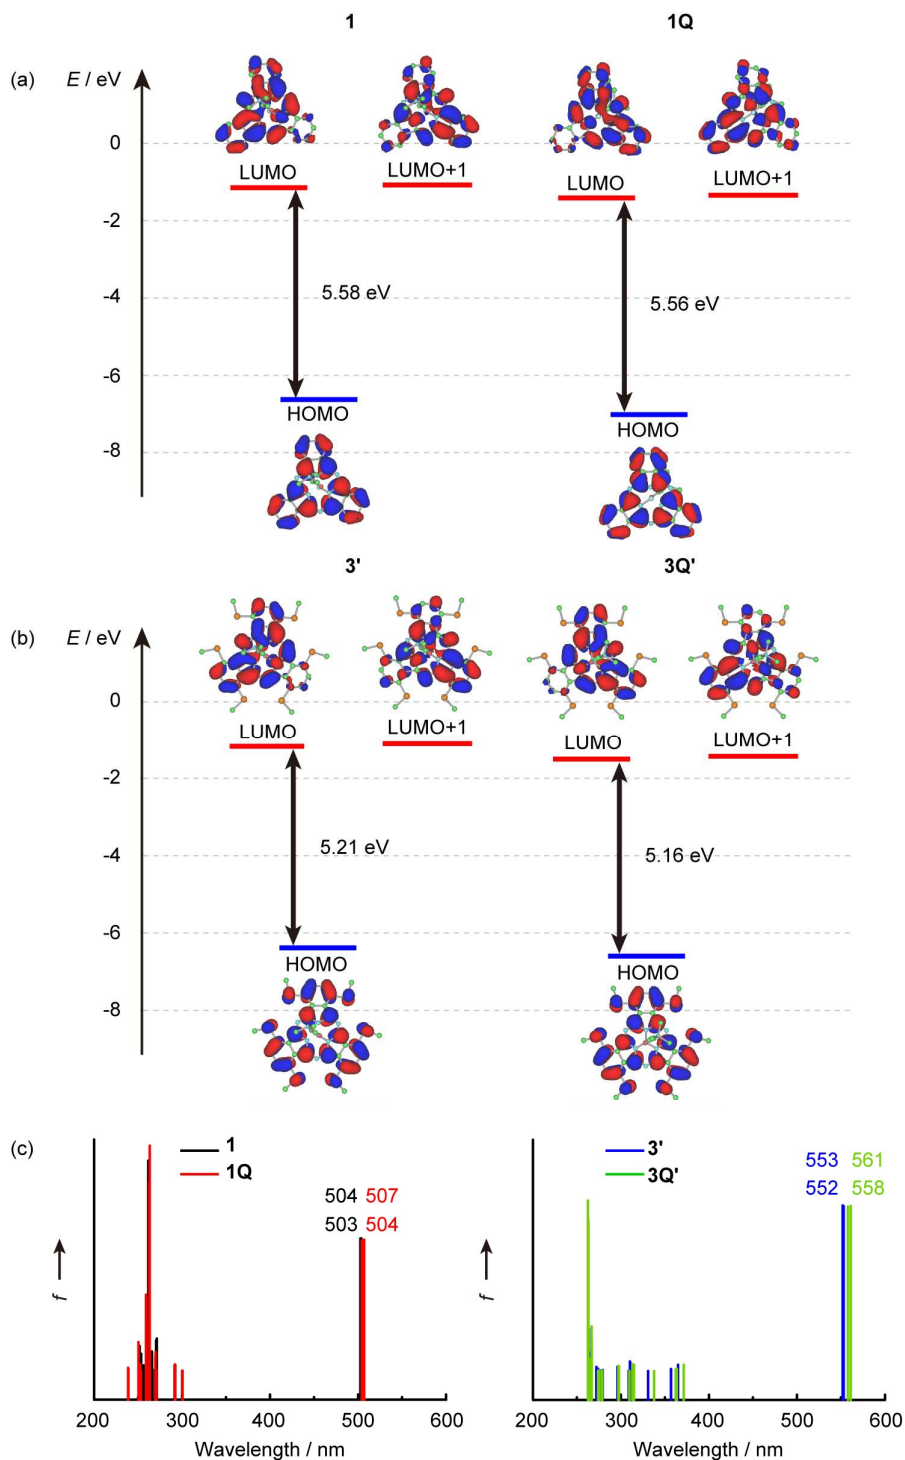

**Figure S1.** Partial molecular energy diagram and orbitals of (a) peripherally unsubstituted SubPcs (**1** and **1Q**), (b) peripherally substituted (MeS)<sub>6</sub>SubPcs (**3'** and **3Q'**), and (c) their calculated absorption spectra. Calculations were performed at the  $\omega$ B97XD/6-31G\*\*/B3LYP/6-31G\* level of theory, using a polarizable



continuum model (PCM), which mimicked the solvation effect of dichloromethane.

# **Cartesian Coordinates and Total Electron Energies**

**1**

SCF Done: E(RB3LYP) = -1563.69370529 A.U.

| Center<br>Number | Atomic<br>Number | Atomic<br>Type | Coordinates (Angstroms) |           |           |
|------------------|------------------|----------------|-------------------------|-----------|-----------|
|                  |                  |                | X                       | Y         | Z         |
| 1                | 5                | 0              | -0.169416               | 0.024748  | 0.627028  |
| 2                | 7                | 0              | -0.190207               | 1.252469  | -0.257152 |
| 3                | 6                | 0              | -0.953279               | 1.352177  | -1.389242 |
| 4                | 6                | 0              | -0.686028               | 2.680105  | -1.929668 |
| 5                | 6                | 0              | -1.195068               | 3.364136  | -3.036803 |
| 6                | 6                | 0              | -0.665332               | 4.617232  | -3.338535 |
| 7                | 1                | 0              | -1.056741               | 5.174075  | -4.184858 |
| 8                | 6                | 0              | 0.374463                | 5.174258  | -2.568643 |
| 9                | 1                | 0              | 0.767331                | 6.151346  | -2.834231 |
| 10               | 6                | 0              | 0.910328                | 4.491998  | -1.478096 |
| 11               | 6                | 0              | 0.370650                | 3.246141  | -1.147088 |
| 12               | 6                | 0              | 0.733712                | 2.256322  | -0.139392 |
| 13               | 7                | 0              | 1.870045                | 2.112916  | 0.562270  |
| 14               | 7                | 0              | 1.288165                | -0.160692 | 0.939115  |
| 15               | 6                | 0              | 2.167460                | 0.884053  | 1.016554  |
| 16               | 6                | 0              | 3.456491                | 0.287114  | 1.347123  |
| 17               | 6                | 0              | 4.714878                | 0.843453  | 1.591715  |
| 18               | 6                | 0              | 5.787399                | -0.019913 | 1.806515  |
| 19               | 1                | 0              | 6.771173                | 0.390373  | 2.014876  |
| 20               | 6                | 0              | 5.621011                | -1.417650 | 1.752895  |
| 21               | 1                | 0              | 6.479292                | -2.061653 | 1.920752  |
| 22               | 6                | 0              | 4.377907                | -1.986637 | 1.483112  |
| 23               | 6                | 0              | 3.287332                | -1.133851 | 1.292707  |
| 24               | 6                | 0              | 1.897343                | -1.385300 | 0.929773  |
| 25               | 7                | 0              | 1.324196                | -2.472340 | 0.387026  |
| 26               | 7                | 0              | -0.469811               | -1.093814 | -0.346628 |
| 27               | 6                | 0              | 0.192144                | -2.292244 | -0.313149 |
| 28               | 6                | 0              | -0.383783               | -3.090539 | -1.389116 |
| 29               | 6                | 0              | -0.148550               | -4.399846 | -1.817555 |
| 30               | 6                | 0              | -0.820081               | -4.853722 | -2.951041 |
| 31               | 1                | 0              | -0.665136               | -5.872957 | -3.292672 |
| 32               | 6                | 0              | -1.693679               | -4.012296 | -3.667395 |
| 33               | 1                | 0              | -2.197503               | -4.396843 | -4.549361 |
| 34               | 6                | 0              | -1.917255               | -2.696166 | -3.267895 |
| 35               | 6                | 0              | -1.271418               | -2.235343 | -2.117407 |
| 36               | 6                | 0              | -1.224779               | -0.926333 | -1.476258 |
| 37               | 7                | 0              | -1.543735               | 0.287207  | -1.956722 |
| 38               | 8                | 0              | -0.944835               | 0.071481  | 1.820528  |
| 39               | 6                | 0              | -2.352880               | 0.241109  | 1.750316  |
| 40               | 1                | 0              | -2.802604               | -0.558060 | 1.143521  |
| 41               | 1                | 0              | -2.614117               | 1.201158  | 1.281143  |
| 42               | 6                | 0              | -2.896438               | 0.219305  | 3.180119  |
| 43               | 1                | 0              | -2.619981               | -0.742096 | 3.656349  |
| 44               | 1                | 0              | -2.378362               | 1.008641  | 3.736473  |
| 45               | 7                | 0              | -4.334436               | 0.478148  | 3.250294  |
| 46               | 6                | 0              | -4.734678               | 0.867948  | 4.598909  |
| 47               | 1                | 0              | -5.803378               | 1.109330  | 4.609562  |
| 48               | 1                | 0              | -4.558904               | 0.074751  | 5.351941  |
| 49               | 1                | 0              | -4.179570               | 1.759525  | 4.909390  |
| 50               | 6                | 0              | -5.129520               | -0.658604 | 2.792748  |
| 51               | 1                | 0              | -4.972853               | -1.566699 | 3.408000  |
| 52               | 1                | 0              | -6.193214               | -0.400605 | 2.834760  |
| 53               | 1                | 0              | -4.888025               | -0.907310 | 1.755420  |
| 54               | 1                | 0              | -1.985426               | 2.929673  | -3.640997 |

|    |   |   |           |           |           |
|----|---|---|-----------|-----------|-----------|
| 55 | 1 | 0 | 1.722400  | 4.916221  | -0.895816 |
| 56 | 1 | 0 | 4.848811  | 1.920413  | 1.618046  |
| 57 | 1 | 0 | 4.255162  | -3.063768 | 1.426610  |
| 58 | 1 | 0 | 0.536269  | -5.045172 | -1.276199 |
| 59 | 1 | 0 | -2.578484 | -2.044622 | -3.830710 |

# **TD-DFT output**

HOMO: 126, LUMO: 127

Excited State 1: Singlet-A 2.4498 eV 506.10 nm f=0.4147 <S\*\*2>=0.000  
122 ->128 0.11055  
126 ->127 0.69569

This state for optimization and/or second-order correction.

Total Energy, E(TD-HF/TD-DFT) = -1563.60367664

Copying the excited state density for this state as the 1-particle RhoCI density.

Excited State 2: Singlet-A 2.4553 eV 504.97 nm f=0.4143 <S\*\*2>=0.000  
122 ->127 -0.11127  
126 ->128 0.69524

Excited State 3: Singlet-A 2.8262 eV 438.70 nm f=0.0005 <S\*\*2>=0.000  
125 ->127 0.70591

Excited State 4: Singlet-A 2.8477 eV 435.39 nm f=0.0006 <S\*\*2>=0.000  
125 ->128 0.70583

Excited State 5: Singlet-A 3.6344 eV 341.14 nm f=0.0000 <S\*\*2>=0.000  
123 ->128 0.36552  
124 ->127 0.57376  
126 ->131 0.12842

Excited State 6: Singlet-A 3.6960 eV 335.45 nm f=0.0009 <S\*\*2>=0.000  
122 ->127 0.12013  
123 ->127 0.44567  
124 ->128 0.47302  
126 ->129 0.15753  
126 ->130 -0.13851

Excited State 7: Singlet-A 3.7012 eV 334.99 nm f=0.0015 <S\*\*2>=0.000  
123 ->128 0.55165  
124 ->127 -0.34802  
126 ->129 0.13861  
126 ->130 0.15163

Excited State 8: Singlet-A 3.8671 eV 320.62 nm f=0.0187 <S\*\*2>=0.000  
120 ->127 -0.16141  
121 ->128 0.20167  
123 ->127 0.45171  
124 ->128 -0.44795

Excited State 9: Singlet-A 3.8753 eV 319.93 nm f=0.0212 <S\*\*2>=0.000  
123 ->127 -0.14692  
126 ->129 0.64948

Excited State 10: Singlet-A 3.8776 eV 319.75 nm f=0.0211 <S\*\*2>=0.000  
123 ->128 -0.10046  
124 ->127 0.11043  
126 ->130 0.65340

Excited State 11: Singlet-A 3.9138 eV 316.79 nm f=0.0000 <S\*\*2>=0.000  
121 ->127 0.17249  
123 ->128 -0.11860  
126 ->131 0.65717

Excited State 12: Singlet-A 3.9838 eV 311.22 nm f=0.0274 <S\*\*2>=0.000  
119 ->127 0.56088

|                   |           |           |           |          |              |
|-------------------|-----------|-----------|-----------|----------|--------------|
| 121 ->127         | -0.34474  |           |           |          |              |
| 122 ->128         | -0.12141  |           |           |          |              |
| 126 ->131         | 0.17365   |           |           |          |              |
| Excited State 13: | Singlet-A | 4.0405 eV | 306.85 nm | f=0.3596 | <S**2>=0.000 |
| 118 ->127         | -0.16506  |           |           |          |              |
| 119 ->128         | -0.24441  |           |           |          |              |
| 120 ->127         | 0.12838   |           |           |          |              |
| 122 ->127         | 0.59328   |           |           |          |              |
| 123 ->127         | -0.13580  |           |           |          |              |
| Excited State 14: | Singlet-A | 4.0464 eV | 306.41 nm | f=0.0113 | <S**2>=0.000 |
| 115 ->128         | 0.10290   |           |           |          |              |
| 118 ->127         | -0.11435  |           |           |          |              |
| 119 ->128         | 0.49831   |           |           |          |              |
| 120 ->127         | -0.25162  |           |           |          |              |
| 121 ->128         | -0.24123  |           |           |          |              |
| 122 ->127         | 0.26964   |           |           |          |              |
| Excited State 15: | Singlet-A | 4.0514 eV | 306.03 nm | f=0.2756 | <S**2>=0.000 |
| 118 ->128         | -0.19470  |           |           |          |              |
| 121 ->127         | -0.11052  |           |           |          |              |
| 122 ->128         | 0.64061   |           |           |          |              |
| Excited State 16: | Singlet-A | 4.0799 eV | 303.89 nm | f=0.0005 | <S**2>=0.000 |
| 116 ->128         | 0.12118   |           |           |          |              |
| 119 ->127         | 0.27175   |           |           |          |              |
| 120 ->128         | 0.50576   |           |           |          |              |
| 121 ->127         | 0.36468   |           |           |          |              |
| Excited State 17: | Singlet-A | 4.0963 eV | 302.68 nm | f=0.0148 | <S**2>=0.000 |
| 115 ->128         | 0.17354   |           |           |          |              |
| 116 ->127         | 0.18890   |           |           |          |              |
| 120 ->127         | 0.41591   |           |           |          |              |
| 121 ->128         | -0.41060  |           |           |          |              |
| 123 ->127         | 0.17205   |           |           |          |              |
| 124 ->128         | -0.15786  |           |           |          |              |
| Excited State 18: | Singlet-A | 4.1242 eV | 300.62 nm | f=0.1869 | <S**2>=0.000 |
| 116 ->128         | 0.12331   |           |           |          |              |
| 119 ->127         | -0.29239  |           |           |          |              |
| 120 ->128         | 0.41903   |           |           |          |              |
| 121 ->127         | -0.39062  |           |           |          |              |
| 126 ->130         | 0.10068   |           |           |          |              |
| Excited State 19: | Singlet-A | 4.1307 eV | 300.15 nm | f=0.1471 | <S**2>=0.000 |
| 116 ->127         | 0.11874   |           |           |          |              |
| 118 ->127         | 0.12941   |           |           |          |              |
| 119 ->128         | 0.41163   |           |           |          |              |
| 120 ->127         | 0.34773   |           |           |          |              |
| 121 ->128         | 0.36580   |           |           |          |              |
| Excited State 20: | Singlet-A | 4.3135 eV | 287.43 nm | f=0.0591 | <S**2>=0.000 |
| 115 ->127         | 0.39280   |           |           |          |              |
| 115 ->128         | -0.10795  |           |           |          |              |
| 116 ->128         | 0.40651   |           |           |          |              |
| 118 ->128         | 0.36870   |           |           |          |              |

# **1Q**

SCF Done: E(RB3LYP) = -1603.45188257 A.U.

| Center<br>Number | Atomic<br>Number | Atomic<br>Type | Coordinates (Angstroms) |           |           |
|------------------|------------------|----------------|-------------------------|-----------|-----------|
|                  |                  |                | X                       | Y         | Z         |
| 1                | 5                | 0              | 0.090501                | -0.000953 | -0.494225 |
| 2                | 7                | 0              | 0.076985                | 1.209193  | 0.403356  |
| 3                | 6                | 0              | 0.641002                | 1.225921  | 1.652602  |

|    |   |   |           |           |           |
|----|---|---|-----------|-----------|-----------|
| 4  | 6 | 0 | 0.396514  | 2.563771  | 2.176652  |
| 5  | 6 | 0 | 0.763360  | 3.185321  | 3.373673  |
| 6  | 6 | 0 | 0.294410  | 4.474424  | 3.617454  |
| 7  | 1 | 0 | 0.578883  | 4.982861  | 4.533931  |
| 8  | 6 | 0 | -0.549703 | 5.129969  | 2.699514  |
| 9  | 1 | 0 | -0.901330 | 6.132611  | 2.923948  |
| 10 | 6 | 0 | -0.946032 | 4.512702  | 1.515036  |
| 11 | 6 | 0 | -0.461425 | 3.230065  | 1.243653  |
| 12 | 6 | 0 | -0.729570 | 2.291072  | 0.161647  |
| 13 | 7 | 0 | -1.738161 | 2.255374  | -0.724316 |
| 14 | 7 | 0 | -1.292027 | -0.054540 | -1.063399 |
| 15 | 6 | 0 | -2.056532 | 1.064386  | -1.256738 |
| 16 | 6 | 0 | -3.314967 | 0.585521  | -1.816083 |
| 17 | 6 | 0 | -4.463313 | 1.252847  | -2.250528 |
| 18 | 6 | 0 | -5.552104 | 0.488726  | -2.665634 |
| 19 | 1 | 0 | -6.449475 | 0.985568  | -3.022292 |
| 20 | 6 | 0 | -5.513913 | -0.918791 | -2.625264 |
| 21 | 1 | 0 | -6.382474 | -1.483122 | -2.951538 |
| 22 | 6 | 0 | -4.385996 | -1.597795 | -2.168728 |
| 23 | 6 | 0 | -3.276139 | -0.845489 | -1.774984 |
| 24 | 6 | 0 | -1.994523 | -1.222564 | -1.190914 |
| 25 | 7 | 0 | -1.613057 | -2.361922 | -0.591253 |
| 26 | 7 | 0 | 0.140571  | -1.155680 | 0.472119  |
| 27 | 6 | 0 | -0.605701 | -2.291885 | 0.294196  |
| 28 | 6 | 0 | -0.289229 | -3.150762 | 1.428421  |
| 29 | 6 | 0 | -0.703880 | -4.440043 | 1.774315  |
| 30 | 6 | 0 | -0.276681 | -4.965398 | 2.991887  |
| 31 | 1 | 0 | -0.573674 | -5.971081 | 3.274272  |
| 32 | 6 | 0 | 0.529042  | -4.213066 | 3.869240  |
| 33 | 1 | 0 | 0.839160  | -4.651596 | 4.813101  |
| 34 | 6 | 0 | 0.927701  | -2.916695 | 3.550645  |
| 35 | 6 | 0 | 0.529637  | -2.386097 | 2.320264  |
| 36 | 6 | 0 | 0.702622  | -1.069654 | 1.719397  |
| 37 | 7 | 0 | 1.035730  | 0.105214  | 2.279212  |
| 38 | 8 | 0 | 1.069029  | -0.006071 | -1.551505 |
| 39 | 6 | 0 | 2.440517  | 0.033789  | -1.234098 |
| 40 | 1 | 0 | 2.720912  | -0.805959 | -0.583677 |
| 41 | 1 | 0 | 2.698829  | 0.966861  | -0.714660 |
| 42 | 6 | 0 | 3.150511  | -0.062626 | -2.588603 |
| 43 | 1 | 0 | 2.885252  | -1.007057 | -3.068042 |
| 44 | 1 | 0 | 2.819120  | 0.757558  | -3.229010 |
| 45 | 6 | 0 | 5.171875  | -0.153461 | -3.971852 |
| 46 | 1 | 0 | 6.261363  | -0.116094 | -3.962199 |
| 47 | 1 | 0 | 4.833284  | -1.112518 | -4.364240 |
| 48 | 1 | 0 | 4.773107  | 0.662373  | -4.574626 |
| 49 | 6 | 0 | 5.239209  | -1.123886 | -1.721716 |
| 50 | 1 | 0 | 4.851773  | -2.070343 | -2.099722 |
| 51 | 1 | 0 | 6.325840  | -1.100736 | -1.806918 |
| 52 | 1 | 0 | 4.948154  | -0.985943 | -0.681801 |
| 53 | 6 | 0 | 5.148179  | 1.322051  | -2.013665 |
| 54 | 1 | 0 | 4.696906  | 2.122140  | -2.600778 |
| 55 | 1 | 0 | 4.858715  | 1.413045  | -0.968210 |
| 56 | 1 | 0 | 6.234153  | 1.359540  | -2.099031 |
| 57 | 7 | 0 | 4.671373  | -0.002605 | -2.555223 |
| 58 | 1 | 0 | -1.338772 | -5.015350 | 1.107840  |
| 59 | 1 | 0 | 1.533976  | -2.332783 | 4.236079  |
| 60 | 1 | 0 | 1.399097  | 2.675657  | 4.090915  |
| 61 | 1 | 0 | -1.610405 | 5.012903  | 0.817411  |
| 62 | 1 | 0 | -4.501192 | 2.337542  | -2.266868 |
| 63 | 1 | 0 | -4.365067 | -2.682101 | -2.122932 |

-----

**TD-DFT output**  
**HOMO: 130, LUMO: 131**

Excited State 1: Singlet-A 2.4355 eV 509.06 nm f=0.4096 <S\*\*2>=0.000  
127 ->132 0.11111

130 ->131 0.69588  
This state for optimization and/or second-order correction.  
Total Energy, E(TD-HF/TD-DFT) = -1603.36237802  
Copying the excited state density for this state as the 1-particle RhoCI density.

|                   |           |           |           |          |              |
|-------------------|-----------|-----------|-----------|----------|--------------|
| Excited State 2:  | Singlet-A | 2.4450 eV | 507.10 nm | f=0.4060 | <S**2>=0.000 |
| 127 ->131         | -0.11152  |           |           |          |              |
| 130 ->132         | 0.69541   |           |           |          |              |
| Excited State 3:  | Singlet-A | 3.6280 eV | 341.74 nm | f=0.0000 | <S**2>=0.000 |
| 128 ->131         | 0.51732   |           |           |          |              |
| 129 ->132         | 0.45414   |           |           |          |              |
| 130 ->135         | -0.11835  |           |           |          |              |
| Excited State 4:  | Singlet-A | 3.6873 eV | 336.25 nm | f=0.0018 | <S**2>=0.000 |
| 128 ->131         | -0.41848  |           |           |          |              |
| 128 ->132         | 0.11013   |           |           |          |              |
| 129 ->131         | 0.11373   |           |           |          |              |
| 129 ->132         | 0.49185   |           |           |          |              |
| 130 ->134         | -0.17704  |           |           |          |              |
| Excited State 5:  | Singlet-A | 3.6909 eV | 335.92 nm | f=0.0008 | <S**2>=0.000 |
| 127 ->131         | -0.15206  |           |           |          |              |
| 128 ->131         | 0.11074   |           |           |          |              |
| 128 ->132         | 0.42659   |           |           |          |              |
| 129 ->131         | 0.46671   |           |           |          |              |
| 129 ->132         | -0.11146  |           |           |          |              |
| 130 ->133         | 0.19124   |           |           |          |              |
| Excited State 6:  | Singlet-A | 3.8561 eV | 321.52 nm | f=0.0138 | <S**2>=0.000 |
| 125 ->131         | -0.18734  |           |           |          |              |
| 126 ->132         | -0.21901  |           |           |          |              |
| 128 ->132         | 0.45175   |           |           |          |              |
| 129 ->131         | -0.44314  |           |           |          |              |
| Excited State 7:  | Singlet-A | 3.8904 eV | 318.69 nm | f=0.0121 | <S**2>=0.000 |
| 125 ->131         | 0.18217   |           |           |          |              |
| 126 ->132         | -0.12471  |           |           |          |              |
| 128 ->132         | -0.16564  |           |           |          |              |
| 130 ->133         | 0.64030   |           |           |          |              |
| Excited State 8:  | Singlet-A | 3.8938 eV | 318.42 nm | f=0.0135 | <S**2>=0.000 |
| 125 ->132         | -0.15995  |           |           |          |              |
| 126 ->131         | -0.13759  |           |           |          |              |
| 128 ->131         | -0.13006  |           |           |          |              |
| 130 ->134         | 0.64896   |           |           |          |              |
| Excited State 9:  | Singlet-A | 3.9370 eV | 314.92 nm | f=0.0001 | <S**2>=0.000 |
| 126 ->131         | -0.25023  |           |           |          |              |
| 130 ->135         | 0.63936   |           |           |          |              |
| Excited State 10: | Singlet-A | 4.0005 eV | 309.92 nm | f=0.3890 | <S**2>=0.000 |
| 124 ->131         | 0.14918   |           |           |          |              |
| 127 ->131         | 0.65802   |           |           |          |              |
| 128 ->132         | 0.11823   |           |           |          |              |
| 129 ->131         | 0.12035   |           |           |          |              |
| Excited State 11: | Singlet-A | 4.0171 eV | 308.64 nm | f=0.3514 | <S**2>=0.000 |
| 124 ->132         | 0.14069   |           |           |          |              |
| 127 ->132         | 0.65731   |           |           |          |              |
| Excited State 12: | Singlet-A | 4.0261 eV | 307.95 nm | f=0.0004 | <S**2>=0.000 |
| 123 ->131         | -0.11048  |           |           |          |              |
| 125 ->132         | -0.31210  |           |           |          |              |
| 126 ->131         | 0.53200   |           |           |          |              |
| 127 ->132         | 0.13249   |           |           |          |              |
| 130 ->135         | 0.25431   |           |           |          |              |

|                   |           |           |           |          |              |
|-------------------|-----------|-----------|-----------|----------|--------------|
| Excited State 13: | Singlet-A | 4.0705 eV | 304.59 nm | f=0.0737 | <S**2>=0.000 |
| 120 ->132         | 0.14248   |           |           |          |              |
| 123 ->132         | -0.16680  |           |           |          |              |
| 126 ->132         | 0.60172   |           |           |          |              |
| 129 ->131         | -0.19161  |           |           |          |              |
| 130 ->133         | 0.12490   |           |           |          |              |
| Excited State 14: | Singlet-A | 4.0767 eV | 304.13 nm | f=0.0839 | <S**2>=0.000 |
| 121 ->131         | -0.20063  |           |           |          |              |
| 125 ->131         | 0.60615   |           |           |          |              |
| 128 ->132         | 0.19222   |           |           |          |              |
| 130 ->133         | -0.14467  |           |           |          |              |
| Excited State 15: | Singlet-A | 4.0824 eV | 303.70 nm | f=0.1625 | <S**2>=0.000 |
| 121 ->132         | -0.14333  |           |           |          |              |
| 125 ->132         | 0.56785   |           |           |          |              |
| 126 ->131         | 0.28482   |           |           |          |              |
| 130 ->134         | 0.18012   |           |           |          |              |
| Excited State 16: | Singlet-A | 4.2784 eV | 289.79 nm | f=0.0236 | <S**2>=0.000 |
| 120 ->132         | -0.28179  |           |           |          |              |
| 121 ->131         | 0.23801   |           |           |          |              |
| 122 ->132         | 0.20491   |           |           |          |              |
| 123 ->132         | 0.49988   |           |           |          |              |
| 126 ->132         | 0.19337   |           |           |          |              |
| Excited State 17: | Singlet-A | 4.2866 eV | 289.23 nm | f=0.0136 | <S**2>=0.000 |
| 120 ->131         | -0.23469  |           |           |          |              |
| 121 ->132         | 0.20345   |           |           |          |              |
| 122 ->131         | 0.14377   |           |           |          |              |
| 123 ->131         | 0.56862   |           |           |          |              |
| 124 ->132         | 0.14327   |           |           |          |              |
| 126 ->131         | 0.15983   |           |           |          |              |
| Excited State 18: | Singlet-A | 4.3130 eV | 287.46 nm | f=0.0096 | <S**2>=0.000 |
| 120 ->132         | 0.10523   |           |           |          |              |
| 121 ->131         | 0.62275   |           |           |          |              |
| 122 ->132         | -0.11514  |           |           |          |              |
| 123 ->132         | -0.19744  |           |           |          |              |
| 124 ->131         | -0.10078  |           |           |          |              |
| 125 ->131         | 0.16273   |           |           |          |              |
| Excited State 19: | Singlet-A | 4.3611 eV | 284.30 nm | f=0.0044 | <S**2>=0.000 |
| 121 ->132         | 0.61895   |           |           |          |              |
| 122 ->131         | -0.11188  |           |           |          |              |
| 123 ->131         | -0.22965  |           |           |          |              |
| 124 ->132         | 0.15422   |           |           |          |              |
| 125 ->132         | 0.12629   |           |           |          |              |
| Excited State 20: | Singlet-A | 4.4628 eV | 277.82 nm | f=0.0927 | <S**2>=0.000 |
| 120 ->131         | 0.24059   |           |           |          |              |
| 121 ->132         | -0.12094  |           |           |          |              |
| 122 ->131         | -0.39458  |           |           |          |              |
| 123 ->131         | 0.15749   |           |           |          |              |
| 124 ->132         | 0.45233   |           |           |          |              |

3'

SCF Done: E(RB3LYP) = -4188.68073062 A.U.

| Center<br>Number | Atomic<br>Number | Atomic<br>Type | Coordinates (Angstroms) |          |           |
|------------------|------------------|----------------|-------------------------|----------|-----------|
|                  |                  |                | X                       | Y        | Z         |
| 1                | 5                | 0              | 0.012470                | 0.002721 | 1.197531  |
| 2                | 7                | 0              | -0.335877               | 1.292471 | 0.492417  |
| 3                | 6                | 0              | -1.549695               | 1.528416 | -0.087866 |
| 4                | 6                | 0              | -1.481018               | 2.884623 | -0.616242 |

|    |    |   |           |           |           |
|----|----|---|-----------|-----------|-----------|
| 5  | 6  | 0 | -2.442177 | 3.694265  | -1.251646 |
| 6  | 6  | 0 | -2.010675 | 4.953561  | -1.685065 |
| 7  | 1  | 0 | -2.704159 | 5.631911  | -2.167360 |
| 8  | 6  | 0 | -0.688847 | 5.388179  | -1.520191 |
| 9  | 1  | 0 | -0.438384 | 6.377294  | -1.884414 |
| 10 | 6  | 0 | 0.289383  | 4.592264  | -0.912120 |
| 11 | 6  | 0 | -0.125556 | 3.328727  | -0.448654 |
| 12 | 6  | 0 | 0.604521  | 2.232731  | 0.177139  |
| 13 | 7  | 0 | 1.922783  | 1.967503  | 0.212919  |
| 14 | 7  | 0 | 1.405641  | -0.290477 | 0.725717  |
| 15 | 6  | 0 | 2.298787  | 0.689464  | 0.401335  |
| 16 | 6  | 0 | 3.529645  | -0.003588 | 0.040212  |
| 17 | 6  | 0 | 4.808123  | 0.470908  | -0.311583 |
| 18 | 6  | 0 | 5.760907  | -0.494905 | -0.657277 |
| 19 | 1  | 0 | 6.768204  | -0.197008 | -0.922509 |
| 20 | 6  | 0 | 5.464740  | -1.864312 | -0.677488 |
| 21 | 1  | 0 | 6.260100  | -2.544326 | -0.958067 |
| 22 | 6  | 0 | 4.196202  | -2.358879 | -0.351911 |
| 23 | 6  | 0 | 3.227168  | -1.407906 | 0.021779  |
| 24 | 6  | 0 | 1.819658  | -1.542505 | 0.374266  |
| 25 | 7  | 0 | 0.954396  | -2.549811 | 0.159864  |
| 26 | 7  | 0 | -0.831216 | -1.016042 | 0.467363  |
| 27 | 6  | 0 | -0.356283 | -2.251275 | 0.125982  |
| 28 | 6  | 0 | -1.466360 | -2.938382 | -0.521579 |
| 29 | 6  | 0 | -1.598670 | -4.249880 | -1.017476 |
| 30 | 6  | 0 | -2.812946 | -4.563532 | -1.639672 |
| 31 | 1  | 0 | -2.984888 | -5.559557 | -2.029692 |
| 32 | 6  | 0 | -3.842501 | -3.624306 | -1.786842 |
| 33 | 1  | 0 | -4.749775 | -3.949806 | -2.281499 |
| 34 | 6  | 0 | -3.725727 | -2.308936 | -1.321923 |
| 35 | 6  | 0 | -2.521284 | -1.975793 | -0.672609 |
| 36 | 6  | 0 | -2.032269 | -0.721845 | -0.113351 |
| 37 | 7  | 0 | -2.438441 | 0.544644  | -0.314743 |
| 38 | 16 | 0 | 3.764456  | -4.083108 | -0.374611 |
| 39 | 16 | 0 | 5.130582  | 2.218620  | -0.280934 |
| 40 | 16 | 0 | 1.980176  | 5.092356  | -0.689312 |
| 41 | 16 | 0 | -4.102150 | 3.089153  | -1.448770 |
| 42 | 16 | 0 | -4.994040 | -1.075601 | -1.495250 |
| 43 | 16 | 0 | -0.257156 | -5.398952 | -0.816673 |
| 44 | 6  | 0 | -0.963213 | -6.967239 | -1.427714 |
| 45 | 1  | 0 | -1.199192 | -6.918790 | -2.493623 |
| 46 | 1  | 0 | -0.177659 | -7.711332 | -1.274624 |
| 47 | 1  | 0 | -1.846802 | -7.260934 | -0.855412 |
| 48 | 6  | 0 | -6.382599 | -2.010980 | -2.221679 |
| 49 | 1  | 0 | -7.199961 | -1.290085 | -2.301564 |
| 50 | 1  | 0 | -6.142633 | -2.383494 | -3.220584 |
| 51 | 1  | 0 | -6.696655 | -2.833528 | -1.574232 |
| 52 | 6  | 0 | -4.986021 | 4.529030  | -2.139323 |
| 53 | 1  | 0 | -4.611807 | 4.798564  | -3.130064 |
| 54 | 1  | 0 | -6.026129 | 4.206685  | -2.231319 |
| 55 | 1  | 0 | -4.939242 | 5.390101  | -1.467894 |
| 56 | 6  | 0 | 1.979084  | 6.822826  | -1.269018 |
| 57 | 1  | 0 | 2.999046  | 7.178438  | -1.103735 |
| 58 | 1  | 0 | 1.749732  | 6.894092  | -2.335101 |
| 59 | 1  | 0 | 1.289177  | 7.441097  | -0.689222 |
| 60 | 6  | 0 | 6.921406  | 2.314364  | -0.619305 |
| 61 | 1  | 0 | 7.166090  | 1.951283  | -1.620563 |
| 62 | 1  | 0 | 7.165004  | 3.378058  | -0.561184 |
| 63 | 1  | 0 | 7.502287  | 1.775390  | 0.133355  |
| 64 | 6  | 0 | 5.356233  | -4.901353 | -0.732205 |
| 65 | 1  | 0 | 5.733489  | -4.640484 | -1.724099 |
| 66 | 1  | 0 | 6.105290  | -4.675694 | 0.030991  |
| 67 | 1  | 0 | 5.137131  | -5.971686 | -0.709120 |
| 68 | 8  | 0 | -0.054925 | 0.001592  | 2.619673  |
| 69 | 6  | 0 | -1.284618 | 0.267657  | 3.278159  |
| 70 | 1  | 0 | -2.057582 | -0.438023 | 2.941215  |
| 71 | 1  | 0 | -1.642276 | 1.283628  | 3.054906  |

|    |   |   |           |           |          |
|----|---|---|-----------|-----------|----------|
| 72 | 6 | 0 | -1.041464 | 0.141394  | 4.783221 |
| 73 | 1 | 0 | -0.675069 | -0.880638 | 5.004109 |
| 74 | 1 | 0 | -0.229311 | 0.831109  | 5.039452 |
| 75 | 7 | 0 | -2.211911 | 0.495010  | 5.586070 |
| 76 | 6 | 0 | -1.838389 | 0.761839  | 6.971629 |
| 77 | 1 | 0 | -2.722545 | 1.078549  | 7.536014 |
| 78 | 1 | 0 | -1.407112 | -0.120433 | 7.484359 |
| 79 | 1 | 0 | -1.100571 | 1.570349  | 7.009621 |
| 80 | 6 | 0 | -3.257735 | -0.523048 | 5.528321 |
| 81 | 1 | 0 | -2.924134 | -1.503375 | 5.922669 |
| 82 | 1 | 0 | -4.119006 | -0.195338 | 6.120475 |
| 83 | 1 | 0 | -3.597981 | -0.670441 | 4.499395 |

**TD-DFT output**  
HOMO: 198, LUMO: 199

Excited State 1: Singlet-A 2.0201 eV 613.76 nm f=0.4299 <S\*\*2>=0.000  
198 ->199 0.70092

This state for optimization and/or second-order correction.

Total Energy, E(TD-HF/TD-DFT) = -4188.60649362

Copying the excited state density for this state as the 1-particle RhoCI density.

Excited State 2: Singlet-A 2.0268 eV 611.72 nm f=0.4324 <S\*\*2>=0.000  
198 ->200 0.70085

Excited State 3: Singlet-A 2.5625 eV 483.84 nm f=0.0176 <S\*\*2>=0.000  
196 ->199 0.10768  
197 ->199 0.69411

Excited State 4: Singlet-A 2.5689 eV 482.63 nm f=0.0304 <S\*\*2>=0.000  
196 ->199 0.51049  
197 ->200 -0.48362

Excited State 5: Singlet-A 2.5760 eV 481.31 nm f=0.0132 <S\*\*2>=0.000  
196 ->200 0.68904  
197 ->200 -0.12412

Excited State 6: Singlet-A 2.6297 eV 471.47 nm f=0.0142 <S\*\*2>=0.000  
196 ->199 0.46420  
196 ->200 0.14247  
197 ->199 -0.11621  
197 ->200 0.49291

Excited State 7: Singlet-A 2.7580 eV 449.55 nm f=0.0003 <S\*\*2>=0.000  
195 ->199 0.70636

Excited State 8: Singlet-A 2.7797 eV 446.03 nm f=0.0003 <S\*\*2>=0.000  
195 ->200 0.70629

Excited State 9: Singlet-A 3.1742 eV 390.60 nm f=0.0492 <S\*\*2>=0.000  
188 ->200 0.11837  
194 ->199 0.68585

Excited State 10: Singlet-A 3.1799 eV 389.90 nm f=0.0467 <S\*\*2>=0.000  
188 ->199 -0.11908  
194 ->200 0.68561

Excited State 11: Singlet-A 3.4652 eV 357.80 nm f=0.0004 <S\*\*2>=0.000  
189 ->200 0.11829  
190 ->199 -0.14044



|                   |           |           |           |          |              |  |
|-------------------|-----------|-----------|-----------|----------|--------------|--|
|                   | 192 ->199 | 0.13261   |           |          |              |  |
|                   | 192 ->200 | 0.39346   |           |          |              |  |
|                   | 193 ->199 | 0.51197   |           |          |              |  |
|                   | 193 ->200 | -0.12620  |           |          |              |  |
| Excited State 12: | Singlet-A | 3.5217 eV | 352.06 nm | f=0.0242 | <S**2>=0.000 |  |
|                   | 189 ->199 | 0.10563   |           |          |              |  |
|                   | 190 ->200 | -0.10293  |           |          |              |  |
|                   | 191 ->199 | -0.17628  |           |          |              |  |
|                   | 192 ->199 | 0.41737   |           |          |              |  |
|                   | 192 ->200 | 0.16114   |           |          |              |  |
|                   | 193 ->199 | -0.13072  |           |          |              |  |
|                   | 193 ->200 | 0.40400   |           |          |              |  |
|                   | 198 ->201 | -0.14912  |           |          |              |  |
|                   | 198 ->202 | 0.17587   |           |          |              |  |
| Excited State 13: | Singlet-A | 3.5254 eV | 351.69 nm | f=0.0204 | <S**2>=0.000 |  |
|                   | 189 ->200 | 0.12180   |           |          |              |  |
|                   | 191 ->200 | 0.16142   |           |          |              |  |
|                   | 192 ->199 | -0.12640  |           |          |              |  |
|                   | 192 ->200 | 0.46521   |           |          |              |  |
|                   | 193 ->199 | -0.34970  |           |          |              |  |
|                   | 193 ->200 | -0.16123  |           |          |              |  |
|                   | 198 ->201 | 0.18371   |           |          |              |  |
|                   | 198 ->202 | 0.14906   |           |          |              |  |
| Excited State 14: | Singlet-A | 3.6378 eV | 340.82 nm | f=0.0077 | <S**2>=0.000 |  |
|                   | 192 ->199 | 0.19043   |           |          |              |  |
|                   | 193 ->200 | 0.12117   |           |          |              |  |
|                   | 198 ->201 | 0.63683   |           |          |              |  |
|                   | 198 ->202 | -0.12449  |           |          |              |  |
| Excited State 15: | Singlet-A | 3.6397 eV | 340.64 nm | f=0.0067 | <S**2>=0.000 |  |
|                   | 192 ->200 | -0.15129  |           |          |              |  |
|                   | 193 ->199 | 0.16423   |           |          |              |  |
|                   | 198 ->201 | 0.12375   |           |          |              |  |
|                   | 198 ->202 | 0.63822   |           |          |              |  |
| Excited State 16: | Singlet-A | 3.6625 eV | 338.53 nm | f=0.0077 | <S**2>=0.000 |  |
|                   | 192 ->199 | -0.45983  |           |          |              |  |
|                   | 192 ->200 | 0.14071   |           |          |              |  |
|                   | 193 ->199 | 0.13208   |           |          |              |  |
|                   | 193 ->200 | 0.49094   |           |          |              |  |
| Excited State 17: | Singlet-A | 3.7195 eV | 333.34 nm | f=0.0000 | <S**2>=0.000 |  |
|                   | 189 ->200 | -0.11221  |           |          |              |  |
|                   | 190 ->199 | 0.10412   |           |          |              |  |
|                   | 198 ->203 | 0.67202   |           |          |              |  |
| Excited State 18: | Singlet-A | 3.7595 eV | 329.79 nm | f=0.0008 | <S**2>=0.000 |  |
|                   | 191 ->199 | 0.65609   |           |          |              |  |
|                   | 192 ->199 | 0.14144   |           |          |              |  |
|                   | 193 ->200 | 0.13230   |           |          |              |  |
| Excited State 19: | Singlet-A | 3.7663 eV | 329.19 nm | f=0.0004 | <S**2>=0.000 |  |
|                   | 188 ->200 | 0.10483   |           |          |              |  |
|                   | 190 ->199 | -0.10888  |           |          |              |  |
|                   | 191 ->200 | 0.65661   |           |          |              |  |

192 ->200 -0.12869  
193 ->199 0.11449

Excited State 20: Singlet-A 3.8340 eV 323.38 nm f=0.0000 <S\*\*2>=0.000  
187 ->199 0.15808  
189 ->200 -0.24767  
190 ->199 0.59120  
193 ->199 0.14080  
198 ->203 -0.15387

### 3Q'

SCF Done: E(RB3LYP) = -4228.44003253 A.U.

| Center<br>Number | Atomic<br>Number | Atomic<br>Type | Coordinates (Angstroms) |           |           |
|------------------|------------------|----------------|-------------------------|-----------|-----------|
|                  |                  |                | X                       | Y         | Z         |
| 1                | 5                | 0              | -0.020118               | 0.000442  | 1.042665  |
| 2                | 7                | 0              | 0.556614                | -1.180260 | 0.311725  |
| 3                | 6                | 0              | 1.766097                | -1.152701 | -0.326547 |
| 4                | 6                | 0              | 1.950569                | -2.487372 | -0.880359 |
| 5                | 6                | 0              | 3.025152                | -3.075784 | -1.575539 |
| 6                | 6                | 0              | 2.838995                | -4.391298 | -2.016967 |
| 7                | 1                | 0              | 3.631515                | -4.906212 | -2.546434 |
| 8                | 6                | 0              | 1.644411                | -5.090659 | -1.801602 |
| 9                | 1                | 0              | 1.584312                | -6.105426 | -2.176064 |
| 10               | 6                | 0              | 0.554740                | -4.521067 | -1.132002 |
| 11               | 6                | 0              | 0.723730                | -3.203694 | -0.662623 |
| 12               | 6                | 0              | -0.186006               | -2.290507 | 0.015988  |
| 13               | 7                | 0              | -1.527417               | -2.301663 | 0.114663  |
| 14               | 7                | 0              | -1.461599               | 0.007690  | 0.652524  |
| 15               | 6                | 0              | -2.149344               | -1.131578 | 0.345290  |
| 16               | 6                | 0              | -3.511807               | -0.701535 | 0.058353  |
| 17               | 6                | 0              | -4.679603               | -1.426038 | -0.249344 |
| 18               | 6                | 0              | -5.827615               | -0.673013 | -0.525319 |
| 19               | 1                | 0              | -6.762905               | -1.169037 | -0.755034 |
| 20               | 6                | 0              | -5.822937               | 0.727472  | -0.519358 |
| 21               | 1                | 0              | -6.755017               | 1.231606  | -0.744398 |
| 22               | 6                | 0              | -4.669887               | 1.470651  | -0.237604 |
| 23               | 6                | 0              | -3.506618               | 0.736050  | 0.063242  |
| 24               | 6                | 0              | -2.140637               | 1.154078  | 0.352173  |
| 25               | 7                | 0              | -1.509477               | 2.320462  | 0.127830  |
| 26               | 7                | 0              | 0.565562                | 1.181752  | 0.319883  |
| 27               | 6                | 0              | -0.168065               | 2.299455  | 0.030372  |
| 28               | 6                | 0              | 0.750832                | 3.211408  | -0.637756 |
| 29               | 6                | 0              | 0.592483                | 4.532617  | -1.099941 |
| 30               | 6                | 0              | 1.690758                | 5.101366  | -1.756218 |
| 31               | 1                | 0              | 1.638464                | 6.118582  | -2.125145 |
| 32               | 6                | 0              | 2.884959                | 4.398811  | -1.962929 |
| 33               | 1                | 0              | 3.685773                | 4.914301  | -2.479214 |
| 34               | 6                | 0              | 3.060827                | 3.079604  | -1.528363 |
| 35               | 6                | 0              | 1.975077                | 2.489795  | -0.852369 |
| 36               | 6                | 0              | 1.777243                | 1.150758  | -0.313727 |
| 37               | 7                | 0              | 2.423739                | -0.002837 | -0.562284 |
| 38               | 16               | 0              | -4.611245               | 3.246406  | -0.226930 |
| 39               | 16               | 0              | -4.631697               | -3.202052 | -0.255178 |
| 40               | 16               | 0              | -0.981402               | -5.363735 | -0.838097 |
| 41               | 16               | 0              | 4.516056                | -2.143664 | -1.831600 |
| 42               | 16               | 0              | 4.554518                | 2.146533  | -1.764467 |
| 43               | 16               | 0              | -0.942343               | 5.380219  | -0.814927 |
| 44               | 6                | 0              | -0.601005               | 7.068476  | -1.418533 |
| 45               | 1                | 0              | -0.408570               | 7.083855  | -2.494079 |
| 46               | 1                | 0              | -1.515058               | 7.632124  | -1.216254 |
| 47               | 1                | 0              | 0.228163                | 7.530077  | -0.876484 |
| 48               | 6                | 0              | 5.692142                | 3.366393  | -2.505339 |
| 49               | 1                | 0              | 6.640777                | 2.836440  | -2.620792 |

|    |   |   |           |           |           |
|----|---|---|-----------|-----------|-----------|
| 50 | 1 | 0 | 5.349710  | 3.693870  | -3.489953 |
| 51 | 1 | 0 | 5.843191  | 4.227057  | -1.848977 |
| 52 | 6 | 0 | 5.635736  | -3.357968 | -2.608098 |
| 53 | 1 | 0 | 5.270814  | -3.676584 | -3.587543 |
| 54 | 1 | 0 | 6.581924  | -2.827570 | -2.740320 |
| 55 | 1 | 0 | 5.801074  | -4.224399 | -1.962852 |
| 56 | 6 | 0 | -0.650486 | -7.051631 | -1.448568 |
| 57 | 1 | 0 | -1.562743 | -7.614237 | -1.235617 |
| 58 | 1 | 0 | -0.471621 | -7.065866 | -2.526468 |
| 59 | 1 | 0 | 0.184773  | -7.515124 | -0.917582 |
| 60 | 6 | 0 | -6.376757 | -3.662835 | -0.525976 |
| 61 | 1 | 0 | -6.735525 | -3.336851 | -1.505296 |
| 62 | 1 | 0 | -6.389991 | -4.754964 | -0.491795 |
| 63 | 1 | 0 | -7.023125 | -3.274979 | 0.265280  |
| 64 | 6 | 0 | -6.353323 | 3.720476  | -0.493739 |
| 65 | 1 | 0 | -6.714021 | 3.405331  | -1.475901 |
| 66 | 1 | 0 | -7.002133 | 3.329745  | 0.294106  |
| 67 | 1 | 0 | -6.359694 | 4.812320  | -0.449996 |
| 68 | 8 | 0 | 0.111596  | -0.003859 | 2.476857  |
| 69 | 6 | 0 | 1.391536  | -0.039123 | 3.063449  |
| 70 | 1 | 0 | 2.001247  | 0.814533  | 2.736403  |
| 71 | 1 | 0 | 1.924910  | -0.960629 | 2.792722  |
| 72 | 6 | 0 | 1.120864  | 0.024022  | 4.570430  |
| 73 | 1 | 0 | 0.621826  | 0.965425  | 4.809355  |
| 74 | 1 | 0 | 0.459825  | -0.798820 | 4.850173  |
| 75 | 6 | 0 | 1.855034  | 0.036705  | 6.906649  |
| 76 | 1 | 0 | 2.716730  | -0.017763 | 7.572069  |
| 77 | 1 | 0 | 1.339985  | 0.988749  | 7.034814  |
| 78 | 1 | 0 | 1.173139  | -0.789942 | 7.105761  |
| 79 | 6 | 0 | 3.304588  | 1.058914  | 5.211794  |
| 80 | 1 | 0 | 2.776743  | 2.007472  | 5.313390  |
| 81 | 1 | 0 | 4.113590  | 0.999989  | 5.940248  |
| 82 | 1 | 0 | 3.707967  | 0.956746  | 4.205854  |
| 83 | 6 | 0 | 3.046238  | -1.388835 | 5.308610  |
| 84 | 1 | 0 | 2.329404  | -2.193811 | 5.472772  |
| 85 | 1 | 0 | 3.461689  | -1.451123 | 4.304272  |
| 86 | 1 | 0 | 3.849956  | -1.446545 | 6.042983  |
| 87 | 7 | 0 | 2.338431  | -0.067639 | 5.480203  |

**TD-DFT output**  
**HOMO: 202, LUMO: 203**

Excited State 1: Singlet-A 1.9743 eV 627.99 nm f=0.4190 <S\*\*2>=0.000  
202 ->203 0.70144

This state for optimization and/or second-order correction.

Total Energy, E(TD-HF/TD-DFT) = -4228.36747882

Copying the excited state density for this state as the 1-particle RhoCI density.

Excited State 2: Singlet-A 1.9866 eV 624.12 nm f=0.4223 <S\*\*2>=0.000  
202 ->204 0.70135

Excited State 3: Singlet-A 2.4900 eV 497.93 nm f=0.0202 <S\*\*2>=0.000  
201 ->203 0.70534

Excited State 4: Singlet-A 2.5070 eV 494.55 nm f=0.0317 <S\*\*2>=0.000  
200 ->203 0.49692  
201 ->204 0.50022

Excited State 5: Singlet-A 2.5213 eV 491.75 nm f=0.0160 <S\*\*2>=0.000  
200 ->204 0.70501

Excited State 6: Singlet-A 2.5742 eV 481.64 nm f=0.0139 <S\*\*2>=0.000  
200 ->203 0.49783

|                   |           |           |           |          |              |  |
|-------------------|-----------|-----------|-----------|----------|--------------|--|
| 201 ->204         | -0.49429  |           |           |          |              |  |
| Excited State 7:  | Singlet-A | 3.1541 eV | 393.09 nm | f=0.0539 | <S**2>=0.000 |  |
| 193 ->204         | -0.11966  |           |           |          |              |  |
| 199 ->203         | 0.68624   |           |           |          |              |  |
| Excited State 8:  | Singlet-A | 3.1651 eV | 391.73 nm | f=0.0528 | <S**2>=0.000 |  |
| 193 ->203         | 0.12147   |           |           |          |              |  |
| 199 ->204         | 0.68595   |           |           |          |              |  |
| Excited State 9:  | Singlet-A | 3.4357 eV | 360.87 nm | f=0.0000 | <S**2>=0.000 |  |
| 194 ->203         | 0.13540   |           |           |          |              |  |
| 195 ->204         | 0.13306   |           |           |          |              |  |
| 197 ->203         | 0.47842   |           |           |          |              |  |
| 198 ->204         | 0.47064   |           |           |          |              |  |
| Excited State 10: | Singlet-A | 3.4884 eV | 355.42 nm | f=0.0243 | <S**2>=0.000 |  |
| 194 ->203         | -0.10562  |           |           |          |              |  |
| 195 ->204         | 0.10825   |           |           |          |              |  |
| 196 ->204         | 0.16081   |           |           |          |              |  |
| 197 ->203         | -0.44174  |           |           |          |              |  |
| 198 ->204         | 0.46333   |           |           |          |              |  |
| 202 ->206         | 0.17031   |           |           |          |              |  |
| Excited State 11: | Singlet-A | 3.4944 eV | 354.81 nm | f=0.0257 | <S**2>=0.000 |  |
| 194 ->204         | 0.10035   |           |           |          |              |  |
| 195 ->203         | 0.10388   |           |           |          |              |  |
| 196 ->203         | -0.22116  |           |           |          |              |  |
| 197 ->204         | 0.39837   |           |           |          |              |  |
| 198 ->203         | 0.47155   |           |           |          |              |  |
| 202 ->205         | -0.18778  |           |           |          |              |  |
| Excited State 12: | Singlet-A | 3.6154 eV | 342.94 nm | f=0.0048 | <S**2>=0.000 |  |
| 197 ->204         | -0.40090  |           |           |          |              |  |
| 198 ->203         | 0.48557   |           |           |          |              |  |
| 202 ->205         | 0.30593   |           |           |          |              |  |
| Excited State 13: | Singlet-A | 3.6259 eV | 341.94 nm | f=0.0055 | <S**2>=0.000 |  |
| 196 ->203         | -0.12710  |           |           |          |              |  |
| 197 ->204         | 0.34255   |           |           |          |              |  |
| 202 ->205         | 0.58681   |           |           |          |              |  |
| Excited State 14: | Singlet-A | 3.6289 eV | 341.66 nm | f=0.0038 | <S**2>=0.000 |  |
| 197 ->203         | 0.13605   |           |           |          |              |  |
| 198 ->204         | -0.11534  |           |           |          |              |  |
| 202 ->206         | 0.66339   |           |           |          |              |  |
| Excited State 15: | Singlet-A | 3.6960 eV | 335.46 nm | f=0.0008 | <S**2>=0.000 |  |
| 196 ->203         | 0.64816   |           |           |          |              |  |
| 197 ->204         | 0.21218   |           |           |          |              |  |
| 198 ->203         | 0.13143   |           |           |          |              |  |
| Excited State 16: | Singlet-A | 3.7121 eV | 334.00 nm | f=0.0002 | <S**2>=0.000 |  |
| 195 ->204         | 0.17715   |           |           |          |              |  |
| 196 ->204         | -0.45104  |           |           |          |              |  |
| 197 ->203         | -0.16196  |           |           |          |              |  |
| 202 ->207         | 0.47035   |           |           |          |              |  |

|                   |           |           |           |          |              |
|-------------------|-----------|-----------|-----------|----------|--------------|
| Excited State 17: | Singlet-A | 3.7192 eV | 333.36 nm | f=0.0007 | <S**2>=0.000 |
| 194 ->203         | 0.14057   |           |           |          |              |
| 196 ->204         | 0.49534   |           |           |          |              |
| 198 ->204         | -0.15013  |           |           |          |              |
| 202 ->207         | 0.43845   |           |           |          |              |
| Excited State 18: | Singlet-A | 3.8169 eV | 324.83 nm | f=0.0001 | <S**2>=0.000 |
| 194 ->203         | 0.47695   |           |           |          |              |
| 195 ->203         | 0.11262   |           |           |          |              |
| 195 ->204         | 0.38444   |           |           |          |              |
| 197 ->203         | -0.11900  |           |           |          |              |
| 202 ->207         | -0.26756  |           |           |          |              |
| Excited State 19: | Singlet-A | 3.8636 eV | 320.90 nm | f=0.0014 | <S**2>=0.000 |
| 194 ->203         | 0.25606   |           |           |          |              |
| 194 ->204         | 0.32863   |           |           |          |              |
| 195 ->203         | 0.36800   |           |           |          |              |
| 195 ->204         | -0.34421  |           |           |          |              |
| 202 ->206         | 0.10225   |           |           |          |              |
| Excited State 20: | Singlet-A | 3.8641 eV | 320.86 nm | f=0.0011 | <S**2>=0.000 |
| 193 ->203         | -0.11422  |           |           |          |              |
| 194 ->203         | -0.33937  |           |           |          |              |
| 194 ->204         | 0.26468   |           |           |          |              |
| 195 ->203         | 0.33083   |           |           |          |              |
| 195 ->204         | 0.36335   |           |           |          |              |
